# Supplementary material
Source: PubMed Central journal article supplement (PMC2862414)
Supplement: pp.110.154856_2.pdf [file pp.110.154856_2.pdf]

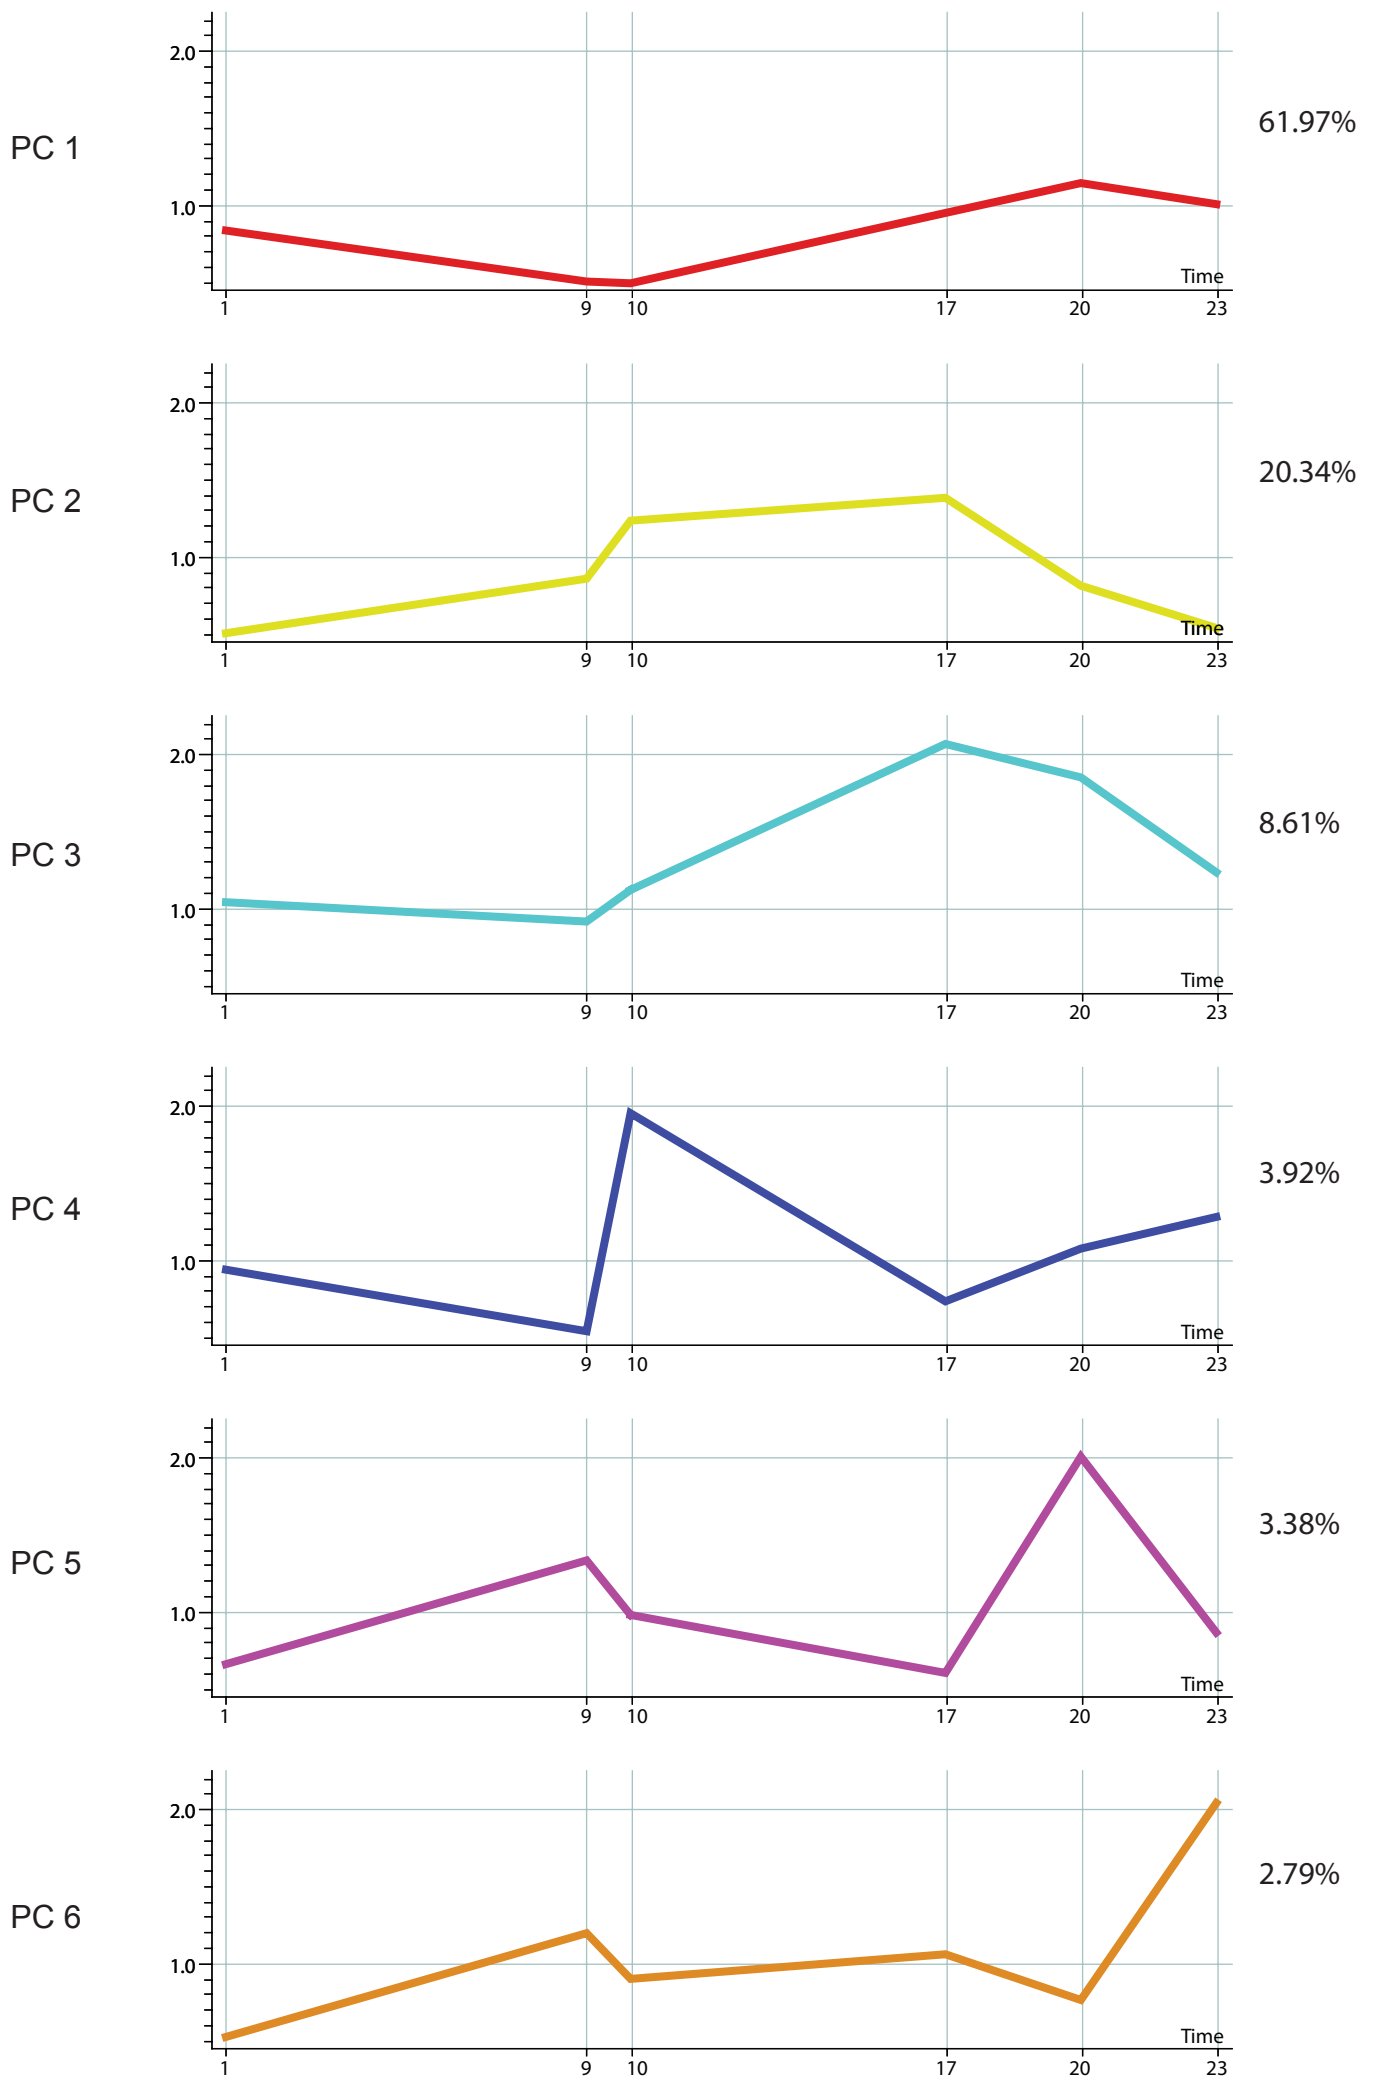

**Figure S2.** Principle Component Analysis of the dataset. The global trajectories of the first six principle components are shown as PC1 to PC6 in the diurnal cycle with the six different time points indicated in the x-axis. The contribution of each PC-trajectory to the entire experiment's variance is given in percent.
