# Supplementary material
Source: PubMed Central journal article supplement (PMC2862414)
Supplement: pp.110.154856_3.pdf [file pp.110.154856_3.pdf]

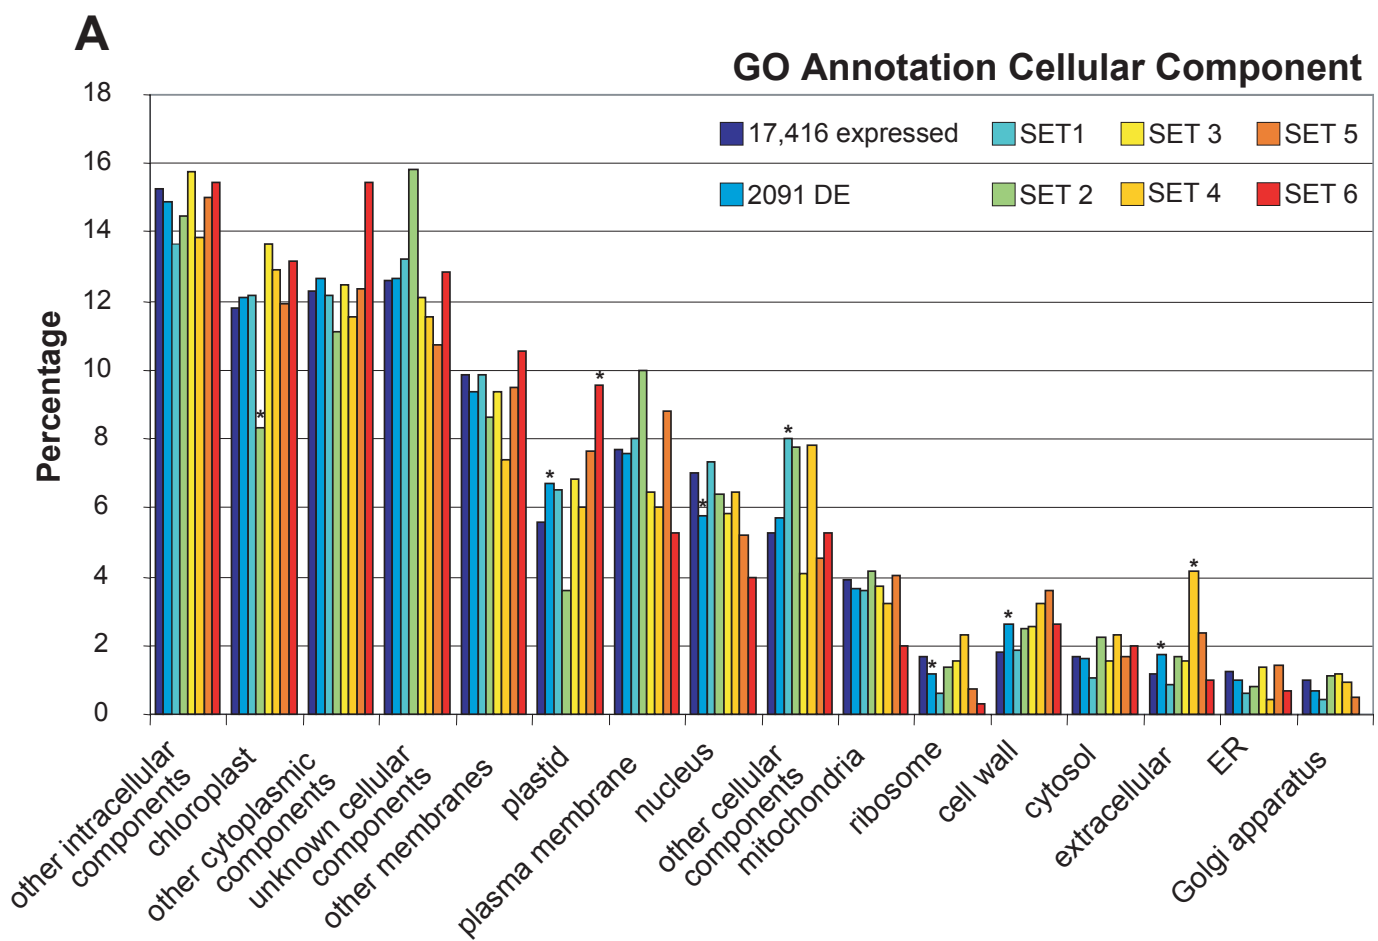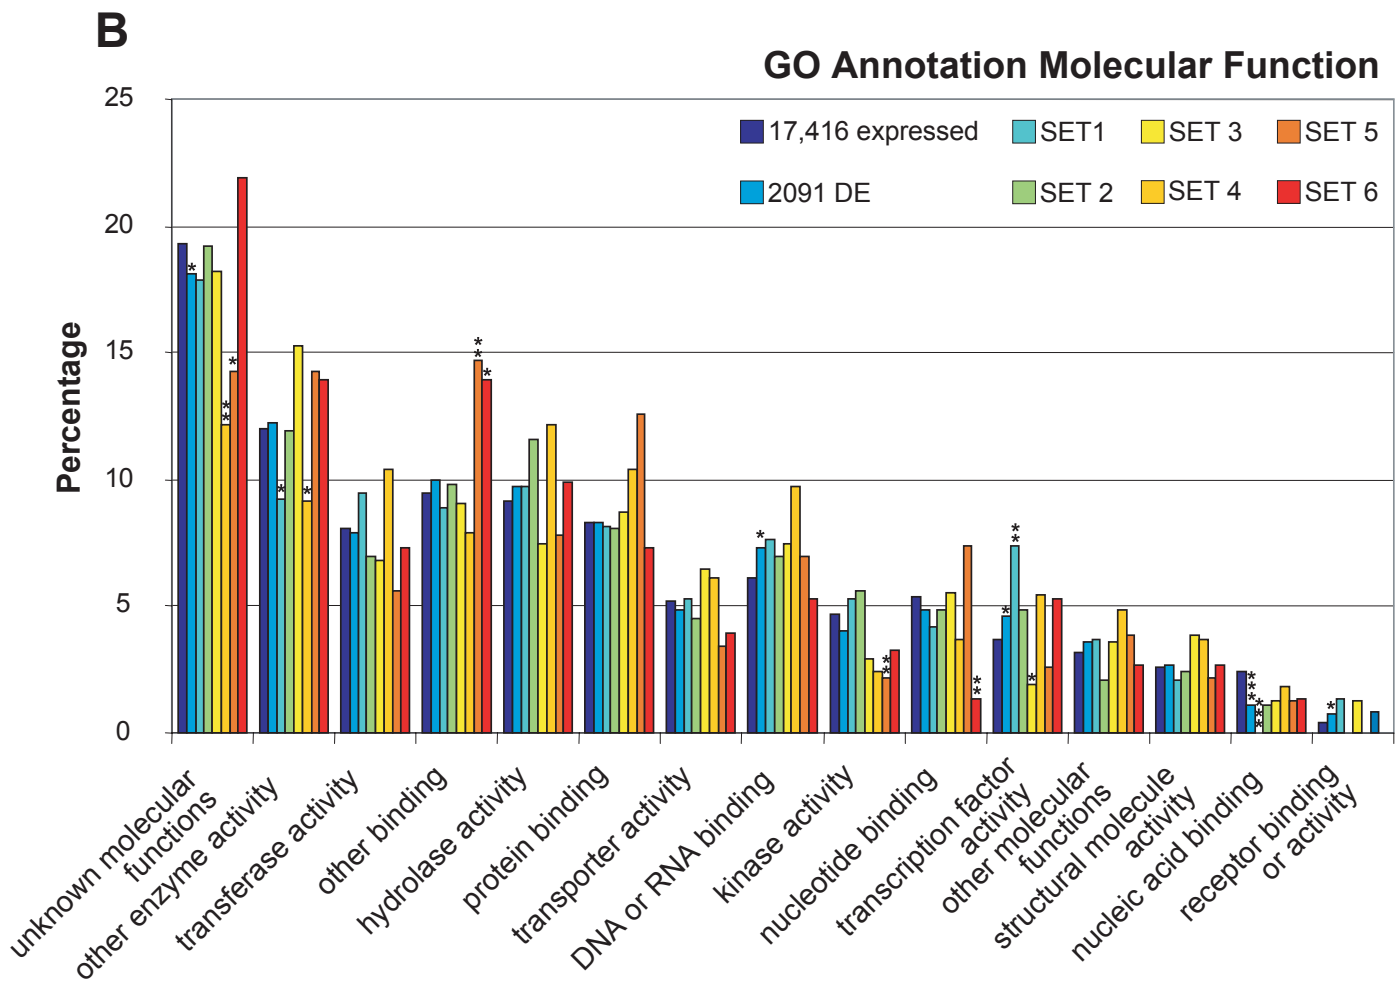

**Figure S3.** Gene Ontology classification of genes belonging to six k-means clusters according to GO groups Cellular Component and Molecular Function. The percentage of genes contained in a particular GO group is shown for all present probesets detected by the microarray (17,416 expressed), all DE genes (2,091 genes) and the subsets of genes belonging to clusters 1 to 6 (Set1 to Set 6). Asterisks indicate a significant over- or underrepresentation of functional categories compared to the functional categories of all expressed genes with putative orthologs in Arabidopsis (\*  $p \leq 0.01$ ; \*\*  $p \leq 0.001$ ; \*\*\*  $p \leq 0.0001$ ).
