# Supplementary material
Source: PubMed Central journal article supplement (PMC2862414)
Supplement: pp.110.154856_4.pdf [file pp.110.154856_4.pdf]

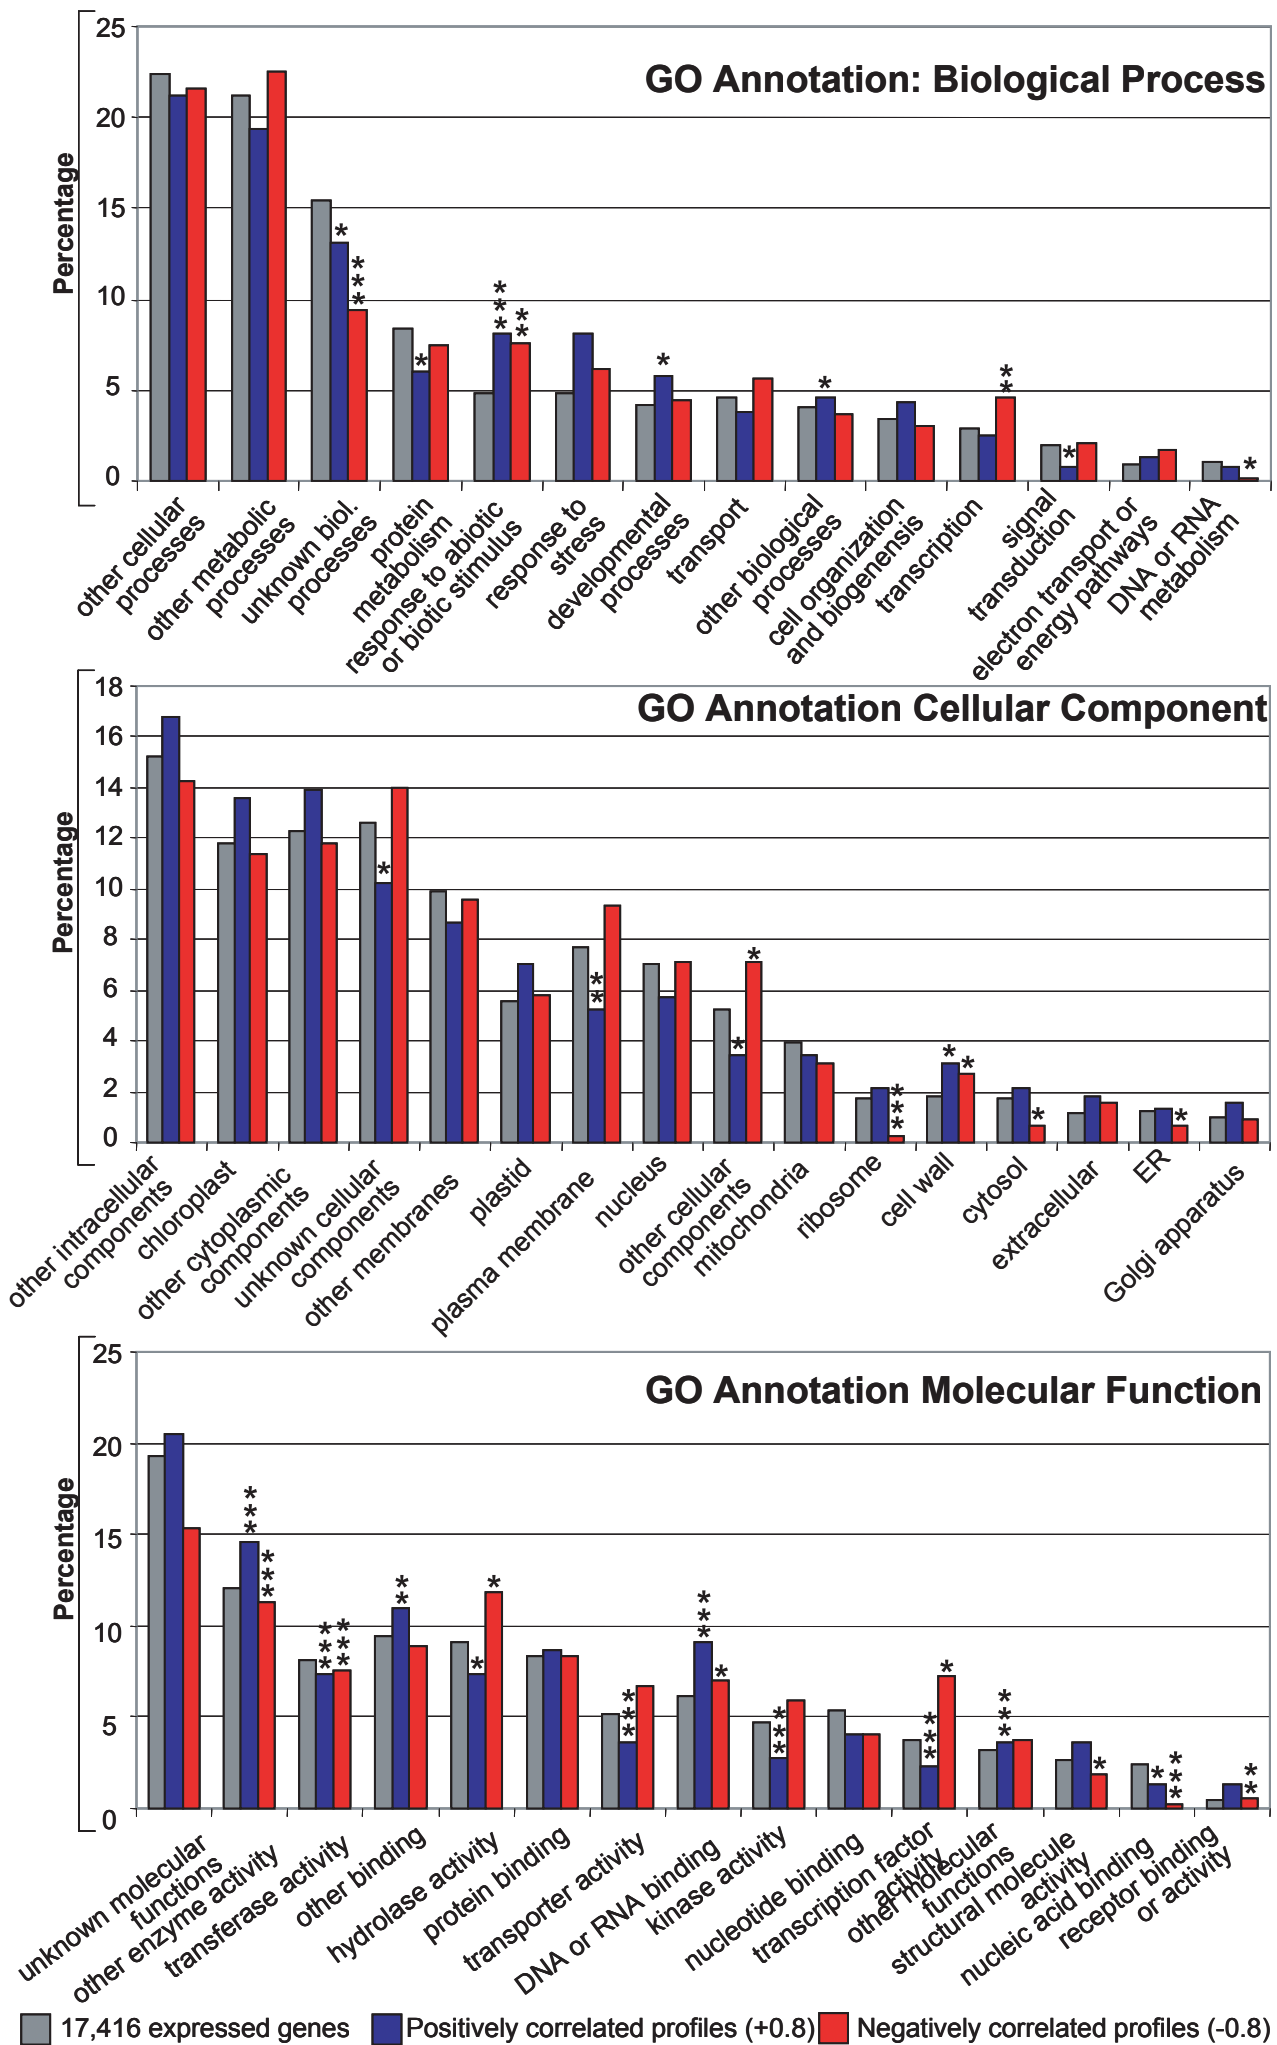

**Figure S4.** GO classification of genes with correlated and anti-correlated expression profiles to sucrose contents. GO classifications Biological Process, Cellular Component and Molecular Function are shown. The percentage of genes contained in a particular GO group is shown for all present probesets detected by the microarray (grey bars) in comparison to all positively correlated genes (blue bars, correlation factor >0.8) and negatively correlated genes (red bars, correlation factor <-0.8). Asterisks indicate a significant over- or underrepresentation of functional categories compared to the functional categories of all expressed genes with putative orthologs in Arabidopsis (\* p < 0.01; \*\* p < 0.001; \*\*\* p < 0.0001).
